# Supplementary material
Source: publisher site journal article supplement (https://www.spandidos-publications.com/6729/downloadSupplementary)
Supplement: Supplementary file 1 [file downloadSupplementary]

## Sheet: miRNA_all_miRNA_exp
Table SIII. miRNAs expression profiles.
miRNA_ID	A1_TPM	A2_TPM	A3_TPM	B1_TPM	B2_TPM	B3_TPM
ocu-let-7a-2-3p	3.4	4.2	4.3	4.9	4.9	3.9
ocu-let-7a-3p	33.3	35.8	58.3	50.4	39.4	21
ocu-let-7a-5p	110797	106957	72290	95456.8	94293.7	93601.5
ocu-let-7b-3p	5.5	6.3	10.7	12.8	14.8	12.5
ocu-let-7b-5p	50008.4	52410.3	39177.1	46046.6	48087.4	31044.8
ocu-let-7c-3p	27.1	37.9	35.8	54.9	30.8	15.7
ocu-let-7c-5p	28356.8	28354.2	22615	23263.3	22537.5	19469.8
ocu-let-7d-3p	40.3	66.8	63.9	62.4	45.3	24.9
ocu-let-7d-5p	864.6	637.8	431.5	560.9	580.3	698.7
ocu-let-7f-2-3p	1.5	0.3	0.8	0.9	1.3	0.4
ocu-let-7f-3p	0.3	1.4	1	0.4	0.8	0.6
ocu-let-7f-5p	111939	113537	92732.6	113721	102798	112474
ocu-let-7g-3p	0.9	0.3	0.8	0	0.8	1.6
ocu-let-7g-5p	5569.7	6247.3	5535.4	5933.7	6136.1	5376.7
ocu-let-7i-3p	20	33.1	37.6	34.5	32.4	32.3
ocu-let-7i-5p	112653	115913	107102	117587	81363.7	127245
ocu-miR-1-3p	1621.3	1282.6	2100.2	600.7	2338	1554.6
ocu-miR-100-3p	21.3	39.3	59.6	36.3	31	34.3
ocu-miR-100-5p	850.1	687.2	580	388.4	616	748.3
ocu-miR-101-2-5p	0	0	0	0	0.3	0
ocu-miR-101-3p	8668.5	10053.6	13023.5	10736.8	14973	12685.2
ocu-miR-101-5p	5.9	5.2	4.1	4	6.7	6.5
ocu-miR-103a-3p	3697.6	2822	2470.9	2936.8	2867.6	2257.8
ocu-miR-105a-3p	0	0	0	0.4	0	0
ocu-miR-105a-5p	0.3	2.1	0.3	0.9	0.3	0.6
ocu-miR-105b-5p	0	0.7	0.3	0.9	0.3	0
ocu-miR-106a-3p	0.9	0	0.3	0	0.3	0
ocu-miR-106a-5p	0	0.3	0	0.9	0.3	0.2
ocu-miR-106b-3p	33.9	20.9	12.3	17.7	19.4	13.1
ocu-miR-106b-5p	20.9	13.2	14.8	15.5	11.1	19.6
ocu-miR-107-3p	268	169.1	139.8	195.5	177.6	125
ocu-miR-107-5p	0.3	0	0	0	0	0
ocu-miR-10a-3p	9.2	14.6	12.8	8	18.9	11.2
ocu-miR-10a-5p	168.2	138.5	107.4	81.8	150.3	153.3
ocu-miR-10b-3p	82.9	69.2	85.6	73.4	91.8	68.8
ocu-miR-10b-5p	4791	3367.2	2809.4	2471.4	3108.9	3752.9
ocu-miR-1197-3p	0	0	0	0	0.8	0.4
ocu-miR-12090-3p	6.8	4.5	0.5	3.5	3	2.7
ocu-miR-12090-5p	0.3	0	0	0	0	0
ocu-miR-12091-3p	2.2	2.1	1.3	6.6	0.8	0
ocu-miR-12091-5p	1.2	1	1.5	4	0	0
ocu-miR-12092-3p	0.9	0.3	0.5	4.9	0.5	1.6
ocu-miR-12092-5p	11.1	13.6	13	23.4	9.2	18.2
ocu-miR-12093-3p	167.2	194.2	205.5	188.4	230.2	144.6
ocu-miR-12093-5p	0.6	0.3	0	0	0.5	0.2
ocu-miR-12095-5p	0.3	0	0	0	0	0
ocu-miR-122-5p	2.8	10.1	38.1	10.2	10.3	5.7
ocu-miR-1249-3p	0.9	0	0.3	1.8	0	0.6
ocu-miR-1249-5p	0.9	0	0	2.7	0	0
ocu-miR-125b-2-3p	71.8	24	17.9	31	20	35.9
ocu-miR-125b-3p	16	8.4	8.4	3.1	8.1	21.2
ocu-miR-125b-5p	48309.1	68069.2	85150.7	66026.3	81450.3	13017.6
ocu-miR-127-3p	774.9	478.8	660.5	491	602.5	617.7
ocu-miR-127-5p	20.3	14.6	26.1	19.5	22.1	28
ocu-miR-1277-3p	1.8	3.1	5.4	6.2	5.7	5.9
ocu-miR-1277-5p	49.9	48	39.6	41.6	31.6	40
ocu-miR-128a-3p	322.5	422.8	531.2	566.2	341.4	158.4
ocu-miR-128a-5p	4.9	6.6	3.3	8.8	2.7	4.1
ocu-miR-128b-3p	296	421	549.6	563.1	341.2	154.4
ocu-miR-128b-5p	0	0	0.5	0	0	0
ocu-miR-129-2-3p	0	0	0	0	0.3	0
ocu-miR-129-5p	2.5	8	10.5	4	6.2	2.7
ocu-miR-1296-5p	19.1	7.3	6.1	8.8	10	2
ocu-miR-1307-3p	6.5	4.2	3.1	12.8	3	3.5
ocu-miR-1307-5p	1.8	2.4	1.8	1.8	1.3	1.8
ocu-miR-130a-3p	242.4	298.5	476	445.4	378.7	262.6
ocu-miR-130a-5p	2.5	1	5.1	3.5	1.1	1
ocu-miR-130b-3p	22.8	17.7	19.2	43.4	13.2	9
ocu-miR-130b-5p	3.4	2.1	0.5	3.5	0	0.4
ocu-miR-133a-3p	51.1	23.3	25.6	5.8	34	32.3
ocu-miR-133a-5p	1.5	1	3.1	0.4	1.1	1.6
ocu-miR-133b-3p	0.9	0	0	0.4	0.3	0.2
ocu-miR-134-5p	2.5	2.1	5.4	5.3	7.6	7.6
ocu-miR-1343-3p	3.7	1.7	0	4	0.8	2
ocu-miR-135a-3p	0	0	0	0.4	0	0
ocu-miR-135a-5p	5.9	1.4	0.5	1.3	0.3	0.6
ocu-miR-135b-3p	0.6	0	0	0	0	0
ocu-miR-135b-5p	28	16.4	12.8	12.4	9.2	25.3
ocu-miR-136-3p	83.8	75.2	137.5	90.2	103.9	76
ocu-miR-136-5p	34.5	18.1	23.3	13.7	24.8	36.3
ocu-miR-137-3p	11.1	5.2	5.9	4.9	5.7	4.3
ocu-miR-138-2-3p	0	0.3	0.5	0	0	0
ocu-miR-138-3p	0.6	0.3	0	0	0.3	0
ocu-miR-138-5p	4.9	3.1	2	1.8	2.7	2.5
ocu-miR-139-3p	26.2	21.9	13	19.5	25.9	14.9
ocu-miR-139-5p	78.2	35.8	32.7	17.7	64.5	132.5
ocu-miR-140-3p	1242.2	2387.7	2755.4	836	4987.6	3177.7
ocu-miR-140-5p	679.2	1592.3	1691.8	532.6	2311.9	2552.1
ocu-miR-141-3p	4136.5	4006.8	4103.9	5644.8	6820.3	5111.1
ocu-miR-141-5p	31.1	35.5	31.7	68.6	37.8	31.4
ocu-miR-142-3p	26.5	29.2	27.4	27.9	21.3	29.2
ocu-miR-142-5p	186	334	669	484.4	195.7	172.9
ocu-miR-143-3p	68829.7	36862.5	40341.3	13577.1	47270.6	65099.9
ocu-miR-143-5p	185.7	176.8	275.3	113.2	231.1	173.8
ocu-miR-144-3p	104.4	161.1	304.7	161	36.2	31
ocu-miR-144-5p	41	33.8	76.4	31.8	14.3	11.4
ocu-miR-145-3p	138.9	105.1	149	75.2	152	119.6
ocu-miR-145-5p	1242.8	1084.9	1737.5	739.6	1552.6	1615.3
ocu-miR-146a-3p	0	0	0	0	0	0.2
ocu-miR-146a-5p	2642.1	5196.4	5252.7	5315.7	2793.4	2832
ocu-miR-146b-3p	0.3	0	0	0	0	0
ocu-miR-146b-5p	50.2	40	20.2	30.5	55.6	40.2
ocu-miR-147-3p	0	0.7	0.5	0.4	1.1	0.2
ocu-miR-147-5p	0	0.7	0	0	0.3	0
ocu-miR-148a-3p	25607.3	21698	22267.8	21688.5	22760.8	34634.1
ocu-miR-148a-5p	4.9	1.4	3.1	0.9	0.8	2.5
ocu-miR-148b-3p	1852	1694.6	1423.9	1686.7	1532.6	1874.6
ocu-miR-148b-5p	22.8	27.8	44.7	37.2	35.6	33.7
ocu-miR-150-3p	0.9	0.7	0.3	0	0	0.2
ocu-miR-150-5p	993.9	1067.9	1000.3	756.4	870.8	269.9
ocu-miR-151-3p	1158.7	1426.6	1932.8	2139.7	1513.2	1070.1
ocu-miR-151-5p	81.9	74.5	118.9	82.7	119.6	124.5
ocu-miR-152-3p	5149.9	5817.5	7808.9	6172.6	5250.8	5397.5
ocu-miR-152-5p	4.3	4.2	3.6	0.9	3.8	3.3
ocu-miR-153-3p	1.2	0.3	0.8	0	0.3	0
ocu-miR-154-3p	0.9	2.1	1.3	2.7	1.1	0.4
ocu-miR-154-5p	14.8	11.5	17.9	10.2	13.8	20
ocu-miR-155-5p	3200.5	1984.1	1334.9	1734	2054.1	3704.1
ocu-miR-15a-3p	0.6	0	0.8	1.3	0.3	0.6
ocu-miR-15a-5p	227.3	214.3	201.2	251.3	213.2	197.2
ocu-miR-15b-3p	61.9	74.1	97.4	123	47.8	19.8
ocu-miR-15b-5p	328.3	365.7	304.2	451.2	248.1	144.6
ocu-miR-16a-3p	7.1	5.6	10.5	9.3	10.5	6.7
ocu-miR-16a-5p	14259.7	15266	16429	21231.1	11877	12039
ocu-miR-16b-3p	1.2	0.3	0.3	1.3	0.8	1
ocu-miR-16b-5p	46728.1	54422.9	53636.8	69021.9	34848.1	34693.2
ocu-miR-17-3p	5.5	2.4	1.5	2.2	1.3	3.1
ocu-miR-17-5p	135.5	96	87.2	205.3	56.1	76.6
ocu-miR-181a-2-3p	16	6.6	4.6	6.2	8.9	6.1
ocu-miR-181a-3p	78.5	37.9	34	59.7	25.6	23.9
ocu-miR-181a-5p	406.3	231	222.1	340.6	246.4	275.8
ocu-miR-181b-2-3p	0.3	0	2.6	4.9	2.2	1
ocu-miR-181b-3p	7.1	9	8.7	13.7	3.8	2.2
ocu-miR-181b-5p	151.5	65.8	66.2	91.6	78	96.4
ocu-miR-181c-3p	29.3	23.3	20.5	17.7	6.7	5.7
ocu-miR-181c-5p	20.6	14.3	13.8	18.6	13	5.7
ocu-miR-181d-3p	0.6	1.4	1	0	0.8	0
ocu-miR-181d-5p	54.2	21.9	28.1	30.1	21.6	31.9
ocu-miR-182-3p	0	0.3	0	0.4	0	0
ocu-miR-182-5p	2310	2214.4	1626.6	3819.7	1248.1	969.9
ocu-miR-183-3p	0.6	0	0	0.9	0	0.2
ocu-miR-183-5p	931.7	688.3	400.6	1040	345.8	268.1
ocu-miR-184-3p	5.2	9.4	6.4	5.8	18.4	15.5
ocu-miR-185-3p	5.5	2.4	2.8	4.9	2.7	2.4
ocu-miR-185-5p	925.9	704.3	627.8	539.7	580.6	596.2
ocu-miR-186-3p	0.3	0.3	1	0	0.3	0.4
ocu-miR-186-5p	598.5	559.2	638.6	642.7	652.9	552.5
ocu-miR-187-3p	16	11.5	7.7	14.2	9.2	9.2
ocu-miR-188-3p	0	0	0.3	0	0.5	0.4
ocu-miR-188-5p	2.5	0.3	2.3	2.2	1.9	4.7
ocu-miR-18a-3p	0.9	0.7	0.5	0	0.3	0.2
ocu-miR-18a-5p	74.5	28.9	18.4	62.8	7.3	13.3
ocu-miR-18b-5p	0.3	0	0	0.4	1.3	0.8
ocu-miR-190a-3p	2.5	0.3	0.3	1.3	0.5	1
ocu-miR-190a-5p	572	499	511.5	754.2	505.8	558
ocu-miR-190b-5p	10.2	8.4	4.6	9.3	9.7	6.7
ocu-miR-191-3p	31.4	40.7	41.9	71.2	36.4	29
ocu-miR-191-5p	5297.4	7996.5	10457.8	11346.8	8683.6	3487.4
ocu-miR-1911-5p	0	0.3	0	0	0	0
ocu-miR-193a-3p	0.3	0	0.3	0	0.3	0.2
ocu-miR-193a-5p	98.9	83.2	59.8	72.5	68.6	63.1
ocu-miR-193b-3p	1.8	4.5	4.6	5.3	7	3.1
ocu-miR-193b-5p	17.9	18.1	25.6	32.3	28.1	6.9
ocu-miR-215-5p	3.1	3.4	3.6	1.2	8	3.1
ocu-miR-194-5p	24.6	19.1	25.3	20.8	47.8	44.9
ocu-miR-195-3p	66.2	90.8	135.2	112.8	144.7	105.2
ocu-miR-195-5p	2167.4	2035.9	1925.4	1547.3	2769.9	2299.5
ocu-miR-196a-2-5p	5.5	5.2	2	6.6	2.2	2.2
ocu-miR-196a-5p	4	1.4	1.8	1.8	0.5	1.2
ocu-miR-196b-5p	8.3	6.6	3.3	4.9	6.5	7.8
ocu-miR-197-3p	3.7	0.3	0.8	3.5	1.3	3.7
ocu-miR-199a-3p	120853	102925	113922	97496.1	95046	148230
ocu-miR-199a-5p	9865.4	15001.6	30001.3	23383.1	18390.2	16382.1
ocu-miR-19a-3p	41.3	32	34.3	72.1	37.2	29.2
ocu-miR-19b-3p	437.4	407.8	470.4	632.6	570.9	390.6
ocu-miR-19b-5p	1.2	0	0	0.4	0	0.4
ocu-miR-200c-3p	2102.1	1721.4	1635	2469.2	2159.4	1663.5
ocu-miR-200c-5p	24.3	18.4	18.7	43.8	12.4	5.9
ocu-miR-204-3p	0	0	0	0	0.8	0.2
ocu-miR-204-5p	26.2	27.1	22	12.4	30.8	14.9
ocu-miR-205-3p	24.3	17.7	19.7	42	27.3	18
ocu-miR-205-5p	5017.1	3280.9	2331.1	3781.2	3239.9	1083
ocu-miR-206-3p	131.5	145.8	4.6	1.8	1.6	1.2
ocu-miR-208a-3p	0	0	0.3	0	0	0
ocu-miR-208b-3p	0	0.7	0	0.4	0	0
ocu-miR-20a-3p	12	5.6	11.5	14.2	7.3	7.3
ocu-miR-20a-5p	673.6	295.8	204.8	473.3	211.1	287.1
ocu-miR-20b-5p	69.3	65.4	83.6	67.7	53.4	35.7
ocu-miR-21-3p	15.7	32.4	46.5	73.4	24	38.6
ocu-miR-21-5p	15926.3	19146.1	22678.1	17257	27893.6	46246.2
ocu-miR-211-3p	0	1.4	0.3	2.7	0.3	0
ocu-miR-211-5p	81.6	25.4	12.8	83.2	30.2	6.9
ocu-miR-212-5p	0.6	0.3	0	0	0.5	0
ocu-miR-214-3p	42.2	15.7	14.3	9.7	7.6	36.6
ocu-miR-214-5p	29	29.2	34.5	21.7	35.9	76.4
ocu-miR-215-3p	0	0	0	0	1.1	3.7
ocu-miR-194-3p	4.6	1.16	2.3	3.5	93.7	103.1
ocu-miR-216a-5p	1.8	2.1	1	0.4	1.9	1.4
ocu-miR-217-5p	1.2	0	0	0	0	0
ocu-miR-218-2-3p	0.3	0.3	1	0.9	0	0.4
ocu-miR-218-5p	976.1	746	845.1	1075.4	628.9	395.7
ocu-miR-219a-3p	1.2	0.7	1.5	3.1	2.2	1.2
ocu-miR-219a-5p	4	1.4	1.8	1.8	3	1.2
ocu-miR-219b-3p	0.3	1.4	0.5	0.4	0.8	0.2
ocu-miR-219b-5p	0	0	0.5	0	0	0.8
ocu-miR-22-3p	422.3	310.7	340.2	260.1	375.5	493.9
ocu-miR-22-5p	12.6	10.8	5.1	4.9	8.6	15.3
ocu-miR-221-3p	580	614.8	502.3	484.4	606.8	532.3
ocu-miR-221-5p	45.6	33.8	22.2	30.5	25.4	26.7
ocu-miR-222-3p	47.4	53.9	63.9	48.2	60.2	55.7
ocu-miR-222-5p	2.8	1	2	0.9	0.8	0.4
ocu-miR-223-3p	906.2	1469.4	1686.4	1785.3	718.5	558
ocu-miR-223-5p	5.2	9.7	17.4	11.1	10	8.4
ocu-miR-224-5p	66.2	86.3	110.2	136.2	102	41.5
ocu-miR-2387-5p	3.4	1.7	3.3	3.1	1.3	0.6
ocu-miR-23b-3p	3645.2	3526.6	3537.1	3191.1	4725	3914
ocu-miR-23b-5p	4.3	7.7	8.7	8.4	8.6	6.3
ocu-miR-24-2-5p	202.4	282.2	274.3	307.9	267.8	195.8
ocu-miR-24-3p	5999.9	6643.2	6161.4	6800.7	5133.6	5020.8
ocu-miR-24-5p	0.6	2.1	0.8	0	0.8	2.2
ocu-miR-25-3p	5073.8	5049.2	4743.7	6818.9	4997.8	2987
ocu-miR-25-5p	12.3	5.6	3.3	14.6	3.2	2.7
ocu-miR-26a-3p	51.7	41.4	58.8	90.7	49.1	43.7
ocu-miR-26a-5p	23940.7	17684	15770.2	13367.4	25954.2	24896.5
ocu-miR-26b-3p	4.3	8	7.4	5.3	6.7	6.7
ocu-miR-26b-5p	13339.1	15298.7	15965.5	15006.8	18981.9	13260.6
ocu-miR-27b-3p	39639.7	55031.5	71659.1	69516	63458.3	51517.3
ocu-miR-27b-5p	5.9	3.8	3.1	5.3	1.9	8.8
ocu-miR-28-3p	1169.5	1437.4	2142.4	2225	1966.1	928.8
ocu-miR-28-5p	29.3	18.1	18.1	17.3	16.7	28.8
ocu-miR-299-3p	38.2	42.1	76.2	43.8	76.4	60.4
ocu-miR-299-5p	8.3	4.5	7.4	5.3	4.9	5.1
ocu-miR-29a-3p	11431	12627.4	14123.7	12196.5	28550	18199.5
ocu-miR-29a-5p	1.8	0.7	0.5	1.3	3.5	1.8
ocu-miR-29b-2-5p	10.8	12.5	18.1	20.3	18.6	12.5
ocu-miR-29b-3p	2453.9	3141.4	4149.1	3845.4	7915.4	5817.3
ocu-miR-29b-5p	2.8	4.2	3.1	7.1	3.8	2.5
ocu-miR-29c-3p	8420.9	11321.6	15583.9	10525.8	20166	11829.9
ocu-miR-29c-5p	4.9	6.3	6.1	6.6	8.1	7.3
ocu-miR-301a-3p	215.6	300.6	418.5	516.7	201.9	148.9
ocu-miR-301a-5p	8	5.2	7.2	10.2	4.9	1.8
ocu-miR-301b-3p	3.1	3.1	3.3	6.6	0.8	0.6
ocu-miR-301b-5p	0.3	0	0.3	0	0	0
ocu-miR-302a-5p	0	0	0	0	0.5	0
ocu-miR-302b-3p	0	0.3	0	0	0.3	0.8
ocu-miR-30a-3p	348.4	381.4	582.8	408.7	516.9	363.6
ocu-miR-30a-5p	3854.7	3409.7	3728.9	2163.5	5483.4	4482.6
ocu-miR-30b-3p	5.5	6.6	4.9	7.5	4.9	5.1
ocu-miR-30b-5p	455.2	449.2	588.5	508.3	661.8	833.9
ocu-miR-30c-2-3p	53.3	60.9	76.2	56.2	77.2	70.8
ocu-miR-30c-3p	17.2	18.8	33	31.8	21.3	9.2
ocu-miR-30c-5p	1044.8	1004.9	1198.1	1087.3	1186.6	1163.6
ocu-miR-30d-3p	38.5	50.1	51.6	71.2	49.4	31.7
ocu-miR-30d-5p	6111.1	4783.4	4094.7	4146.6	6095.9	3846.2
ocu-miR-30e-3p	350.2	407.5	655.2	555.2	494.8	362.4
ocu-miR-30e-5p	3466.3	2762.8	2860.7	2594.4	3828.3	3595.4
ocu-miR-31-3p	14.5	10.1	6.9	21.2	4.3	19.2
ocu-miR-31-5p	1520.6	661.5	210.9	995.7	198.4	462.9
ocu-miR-32-3p	1.5	1.7	6.6	10.6	0.8	1.6
ocu-miR-32-5p	52.7	38.3	48.8	37.6	41.8	46.3
ocu-miR-323a-3p	16	10.8	12.3	13.3	11.6	4.5
ocu-miR-324-3p	13.9	14.3	19.4	31.4	6.2	7.1
ocu-miR-324-5p	64.1	56	52.1	105.3	24.8	62.3
ocu-miR-325-5p	0.3	0	0	0.9	0	0
ocu-miR-326-3p	0.9	1	0.3	0	0	0.6
ocu-miR-328-3p	12.6	11.5	8.9	9.7	10.8	4.7
ocu-miR-329-5p	0.3	0	0	0	0	0.4
ocu-miR-331-3p	20	17.1	22	26.5	18.9	16.7
ocu-miR-331-5p	0.3	1	0.5	1.8	0	1
ocu-miR-335-3p	0.3	0.3	0	2.7	0	0
ocu-miR-335-5p	16.6	20.2	34	30.1	30.2	11.6
ocu-miR-337-3p	1.2	1	3.3	0.4	0.5	2.5
ocu-miR-337-5p	2.2	0.7	2.3	0.9	3	0.8
ocu-miR-33a-3p	1.2	1.4	3.6	1.8	1.9	2.4
ocu-miR-33a-5p	17.6	13.2	15.1	11.9	19.2	13.3
ocu-miR-340-3p	2.8	2.8	4.6	6.2	6.5	4.7
ocu-miR-340-5p	539.9	351.1	288.9	522.4	216.7	246.2
ocu-miR-342-3p	96.1	116.6	103.8	132.3	89.1	28.8
ocu-miR-342-5p	0.3	0	0	0	0	0
ocu-miR-34a-3p	0	0	0	0	0	0.2
ocu-miR-34a-5p	107.2	99.5	149	108.8	152.2	158.7
ocu-miR-34b-3p	0.6	0.7	0.8	0.4	1.1	0
ocu-miR-34b-5p	0.9	0	0.5	0.9	3	1
ocu-miR-34c-3p	2.2	1.7	0	0.4	1.6	1.4
ocu-miR-34c-5p	39.1	5.2	6.6	11.9	30.5	21
ocu-miR-350-3p	33.3	34.1	48.3	33.2	44.3	64.9
ocu-miR-350-5p	0.6	0	0.5	0	0	0.2
ocu-miR-361-3p	27.1	34.8	50.9	54.9	31.9	19.2
ocu-miR-361-5p	159.9	111.7	94.1	117.2	101.5	70
ocu-miR-3613-5p	0	0	0.5	0	0.3	0.8
ocu-miR-362-3p	0.6	1.4	0.8	0	1.1	1.4
ocu-miR-362-5p	0	0	0	0	0	0.2
ocu-miR-363-3p	28.3	23	18.7	13.3	14.3	14.3
ocu-miR-363-5p	0.9	0.3	1	0.4	0	0.2
ocu-miR-365-2-5p	0	0.3	0.3	0.9	0.3	0
ocu-miR-365-3p	184.2	123.5	110.2	100.4	169.8	202.3
ocu-miR-365-5p	2.5	3.1	3.1	2.2	2.4	3.7
ocu-miR-370-3p	6.5	6.3	8.7	6.6	1.9	1.4
ocu-miR-370-5p	0.9	0	1	0	0.5	0.2
ocu-miR-374a-3p	43.4	61.9	89	113.2	80.4	41.7
ocu-miR-374a-5p	169.7	145.8	129.3	125.6	123.9	133.1
ocu-miR-374b-3p	7.4	5.6	6.1	8	4	3.1
ocu-miR-374b-5p	12	7.3	11.2	8.8	6.2	12
ocu-miR-375-3p	23.7	13.9	5.9	10.2	8.6	11.4
ocu-miR-376a-3p	8.9	15.7	20.2	13.7	9.2	10.6
ocu-miR-376a-5p	0	0	0.3	0	0	0.4
ocu-miR-376b-3p	0	0	0.3	0	0	0
ocu-miR-376b-5p	0	0.3	0.8	1.8	1.3	2.4
ocu-miR-376c-2-3p	0.6	0	0	0	1.6	0.6
ocu-miR-376c-3p	0	0	0.5	0	0	0.2
ocu-miR-376c-5p	0.3	0	1.8	1.3	0.5	0.8
ocu-miR-377-3p	0.3	1.7	0.3	1.8	1.1	3.7
ocu-miR-377-5p	0	0	0.8	0	0	0.6
ocu-miR-378-3p	141.1	89.1	80.5	101.3	114.2	122.5
ocu-miR-378-5p	18.8	20.5	16.6	17.3	17	8.8
ocu-miR-379-3p	0.9	2.4	2.8	1.3	1.6	6.3
ocu-miR-379-5p	1088.8	1034.1	1279.2	1121.8	940.4	1466.2
ocu-miR-381-3p	528.5	135.4	177.2	107.5	197	319.8
ocu-miR-381-5p	0.6	0	0	0	0	0.4
ocu-miR-382-3p	2.8	3.8	4.6	1.3	1.9	2.2
ocu-miR-382-5p	59.1	58.1	92.3	74.3	54.8	84.9
ocu-miR-383-3p	0	0.7	0.5	0.4	0.5	0.6
ocu-miR-383-5p	4.6	1.4	4.9	9.7	3.2	8.6
ocu-miR-384-3p	1.8	1	0.5	0.4	1.1	0
ocu-miR-384-5p	1.8	1	0.8	0.9	1.1	0.4
ocu-miR-409-3p	24.6	31	40.6	29.2	16.5	23.7
ocu-miR-409-5p	3.4	2.1	1.8	0.4	5.4	1.2
ocu-miR-410-3p	0.3	0	0	0	0	0
ocu-miR-410-5p	0.3	0.3	0.3	0	0	0
ocu-miR-411-3p	0.3	0	0	0	0	0.2
ocu-miR-411-5p	387.8	376.8	508.7	357.9	381.1	488
ocu-miR-421-3p	8.3	4.9	3.8	7.1	4.6	3.7
ocu-miR-423-3p	74.8	50.8	26.6	37.2	36.2	20
ocu-miR-423-5p	431.2	278	197.3	318.5	230.5	195.2
ocu-miR-424-3p	2.5	1	0.8	2.7	1.1	0
ocu-miR-424-5p	117	182.7	401.6	449.4	174.1	345.5
ocu-miR-425-3p	37	44.9	56	62.4	41.6	23.3
ocu-miR-425-5p	110.3	82.1	55	61.9	72.3	46.3
ocu-miR-432-5p	154.9	146.8	190.7	172.5	116.6	170.5
ocu-miR-433-3p	0.6	1.4	0	0	0	0.2
ocu-miR-433-5p	0	0	0	0	0.3	0
ocu-miR-449a-3p	0	0	0.3	0	0	0
ocu-miR-449a-5p	6.8	5.6	5.6	6.2	10.3	8.2
ocu-miR-449b-5p	0.6	0	0	0	0	0
ocu-miR-450a-2-3p	0.3	1	1.5	1.3	0.3	1.6
ocu-miR-450a-3p	2.2	1.4	3.1	7.5	1.3	2.9
ocu-miR-450a-5p	3.4	1	2.6	1.8	0.5	4.9
ocu-miR-450b-3p	0	0	0	0	0	0.2
ocu-miR-450b-5p	72.7	47	35.8	55.3	24.6	65.5
ocu-miR-451-5p	173.4	200.4	256.9	140.7	50.7	34.3
ocu-miR-452-3p	4.6	6.6	11.8	4.4	7.6	7.3
ocu-miR-452-5p	44.4	56.7	71.1	66.4	93.9	65.7
ocu-miR-455-3p	13.6	17.7	25.8	11.1	31.9	36.3
ocu-miR-455-5p	174.9	191	178.9	81.4	270.5	279.5
ocu-miR-485-3p	0	0	0.3	0	0	0
ocu-miR-486-3p	0	0	0.3	0	0	0
ocu-miR-486-5p	124.1	168.1	214.5	138	53.2	32.5
ocu-miR-487a-3p	0	0	0.3	0	0	0
ocu-miR-487a-5p	1.5	2.8	2	1.3	2.7	2.4
ocu-miR-487b-3p	11.7	14.6	20.2	14.6	15.9	15.5
ocu-miR-487b-5p	0.3	0	0.5	0.9	0.8	2
ocu-miR-489-3p	0.3	0	0	0	0	0
ocu-miR-490-3p	0.6	1.4	0.3	0	1.9	1.2
ocu-miR-490-5p	0.3	0.3	0	0.4	0	0
ocu-miR-491-3p	0	0.3	0	0	0	0.2
ocu-miR-491-5p	17.9	7	7.2	4	7	14.9
ocu-miR-495-3p	0.3	0.3	0.3	0	0	1.2
ocu-miR-495-5p	1.2	1.7	1.3	0.9	0	1.6
ocu-miR-496-3p	0.6	0	0.3	0	0	0
ocu-miR-497-3p	1.2	0.7	0.5	0.9	1.1	1.4
ocu-miR-497-5p	389.3	583.5	843.6	813.9	672.9	483.1
ocu-miR-499-5p	2.5	0.3	1	2.7	0.8	0.6
ocu-miR-500-3p	17.2	14.6	13.3	15.9	10.8	10.8
ocu-miR-500-5p	2.8	2.4	1.8	4	1.3	3.7
ocu-miR-501-3p	21.6	12.2	7.7	10.2	13	4.5
ocu-miR-501-5p	3.7	2.8	2.3	3.1	2.2	1.6
ocu-miR-502a-3p	298.5	231.7	182.8	155.7	194.1	156.2
ocu-miR-502a-5p	4	0.3	0	0.4	1.3	1.8
ocu-miR-502b-3p	24.3	6.3	12	9.3	14	13.5
ocu-miR-502b-5p	2.8	0.7	1.5	0.9	0.5	3.5
ocu-miR-503-3p	4	0.7	5.6	5.3	0.5	2.2
ocu-miR-503-5p	6.8	4.9	4.9	8.4	0.3	0.8
ocu-miR-505-3p	9.5	11.8	15.6	20.8	14.8	24.3
ocu-miR-505-5p	11.1	10.1	17.9	21.2	12.1	6.1
ocu-miR-506-5p	0	0	0	0.4	0	0
ocu-miR-508-3p	0.6	0.7	1	0	0.3	1.6
ocu-miR-509a-3p	0	0.7	0	0.9	0	0
ocu-miR-509b-3p	0.6	0	0	0	0	0
ocu-miR-509b-5p	0	0	0	0	0.3	0
ocu-miR-509c-3p	2.8	1.4	1.5	0.4	1.6	1
ocu-miR-509c-5p	3.4	3.8	1.3	2.2	5.7	1.6
ocu-miR-513-5p	0	0	1.5	0	0.5	1
ocu-miR-532-3p	82.9	76.2	80.5	82.3	75.8	43.9
ocu-miR-532-5p	793.7	1020.9	1836.7	1395.6	1599.8	1106.5
ocu-miR-539-3p	0.3	2.8	4.3	2.2	3.2	2.5
ocu-miR-539-5p	0	0	0	0	0	0.2
ocu-miR-541-5p	0.3	0.7	0	1.3	0	0.8
ocu-miR-542-3p	181.7	178.9	358.9	356.5	215.9	336.9
ocu-miR-542-5p	18.5	31.7	47.8	55.3	40.5	24.7
ocu-miR-545-3p	8.6	5.6	12.5	17.7	11.1	4.5
ocu-miR-545-5p	0.6	1	2.6	5.8	1.9	1.2
ocu-miR-551b-3p	0	1.7	0.5	0.4	0	1
ocu-miR-551b-5p	0.6	0.7	0.3	0	0	0
ocu-miR-574-3p	336	419.6	581	587	373.6	451.9
ocu-miR-574-5p	163.2	139.5	195.6	240.2	73.7	131.3
ocu-miR-582-3p	56.1	26.4	35.3	19	37.8	38
ocu-miR-582-5p	6.2	5.9	7.7	5.3	8.6	19.8
ocu-miR-590-3p	0	0.7	1.3	0.9	0.5	0.2
ocu-miR-628-3p	0.6	2.1	2.8	0.9	2.4	2.2
ocu-miR-628-5p	11.4	9.4	9.5	8	14.3	8.6
ocu-miR-652-3p	4.3	5.2	3.6	7.5	4.9	3.3
ocu-miR-652-5p	1.5	1.7	1.8	1.3	2.4	1.6
ocu-miR-6529-3p	1.8	1.4	0.3	2.7	0.8	1
ocu-miR-6529-5p	117.7	77.9	48.3	99.5	37.5	33.5
ocu-miR-653-3p	0	0	0	0	0.3	0.8
ocu-miR-653-5p	0	0	0.3	0	0.3	0
ocu-miR-654-3p	1.2	0.3	0.3	0.4	0.5	0.2
ocu-miR-655-3p	4.6	5.9	5.4	5.8	11.3	15.9
ocu-miR-656-3p	1.8	1.7	2.8	1.8	1.6	1.6
ocu-miR-656-5p	0	0	0.5	0	0	0
ocu-miR-660-3p	1.8	0.3	1.5	3.1	1.9	0.4
ocu-miR-660-5p	754	722.4	683.8	669.7	684.5	553.7
ocu-miR-670-3p	0	0	0.5	0.4	0	0.2
ocu-miR-671-3p	1.5	1.4	0	0.9	1.6	0.2
ocu-miR-671-5p	17.6	7	6.6	6.2	3.8	7.8
ocu-miR-672-3p	9.2	13.2	8.7	20.3	8.4	4.7
ocu-miR-672-5p	80.1	176.1	253.6	238	119.8	102.5
ocu-miR-676-3p	869.5	1112.8	1379.1	2034.8	1049.7	557.2
ocu-miR-676-5p	1.8	2.4	3.1	3.5	1.1	0.2
ocu-miR-708-3p	65.9	75.5	100	118.1	163.8	87
ocu-miR-708-5p	602.2	277	173.3	352.1	378.4	439
ocu-miR-7180-3p	11.7	4.2	2.8	4.9	2.2	4.7
ocu-miR-744-3p	0.9	0	0	0	0	0
ocu-miR-744-5p	287.4	227.2	164.1	292.8	148.7	38.4
ocu-miR-758-3p	0	0	0	0	0.3	0
ocu-miR-758-5p	0	0	0.3	0	0.3	0
ocu-miR-760-3p	1.5	1.4	2.6	5.3	1.1	0.2
ocu-miR-760-5p	0.3	0	0	0	0	0
ocu-miR-7a-3p	26.8	30.6	36.6	37.2	33.2	23.3
ocu-miR-7a-5p	641.9	630.9	873.7	951.5	784.9	551.9
ocu-miR-802-3p	0	0	0.8	0	0.5	0.8
ocu-miR-802-5p	0	2.4	1.8	0.9	1.9	1.8
ocu-miR-872-3p	20	15.3	20.2	29.6	25.9	25.1
ocu-miR-872-5p	649.3	417.9	347.4	433.1	298	476.8
ocu-miR-873-3p	0	1.4	1.5	0.4	1.3	0.6
ocu-miR-873-5p	0	7.3	8.7	4.9	10	6.3
ocu-miR-874-3p	25.9	24.4	15.3	21.7	14.8	15.3
ocu-miR-874-5p	8.6	5.6	10.2	8.8	8.4	5.3
ocu-miR-885-3p	0.6	0	0	0	0	0.2
ocu-miR-885-5p	0	0	0	0.9	0	0.4
ocu-miR-889-3p	79.5	59.5	70.6	57.5	68.6	92.3
ocu-miR-889-5p	0	0	0	0	0	0.4
ocu-miR-9-3p	9.2	7.3	12.8	8.8	9.4	8.4
ocu-miR-9-5p	255	177.8	248.2	243.7	147.6	138.8
ocu-miR-92a-2-5p	1.8	0.7	1	4	1.1	0.4
ocu-miR-92a-3p	1252.4	585.6	380.6	733.9	600.8	394.7
ocu-miR-92a-5p	0.6	0	0	0.4	0	0
ocu-miR-93-3p	5.2	5.6	3.6	6.6	3.8	1.8
ocu-miR-93-5p	5689.5	6881.9	7926.3	12039.5	5791.7	3684.1
ocu-miR-96-3p	0.6	0	0	0.4	0	0
ocu-miR-96-5p	139.2	41.8	23	70.3	29.4	33.3
ocu-miR-98-3p	0	0.3	0.8	0	0.5	0.8
ocu-miR-98-5p	644.3	403.3	261.8	384	241.8	414.1
ocu-miR-9851-3p	6.2	6.3	2.8	8	3	1.4
ocu-miR-9851-5p	0	0.3	0.3	0	0	0.2
ocu-miR-99a-3p	19.4	28.9	28.4	23.4	28.6	17.8
ocu-miR-99a-5p	3589.8	2496.6	2565	2036.1	2342.9	2107.6
miR/miRNA, microRNA.
